# Supplementary material for: Semi-supervised learning for potential human microRNA-disease associations inference
Source: PubMed Central journal article supplement — Sci Rep. 2014 Jun 30;4:5501. doi: 10.1038/srep05501 (PMC4074792; doi:10.1038/srep05501), 2014-06-30
Supplement: srep05501-s1.pdf [file srep05501-s1.pdf]

# Semi-supervised learning for potential human microRNA-disease associations inference

Xing Chen<sup>1, 2, \*</sup> and Gui-Ying Yan<sup>1, 2, \*</sup>

<sup>1</sup>National Center for Mathematics and Interdisciplinary Sciences, Chinese  
Academy of Sciences, Beijing, 100190, China

<sup>2</sup>Academy of Mathematics and Systems Science, Chinese Academy of  
Sciences, Beijing, 100190, China

\*Corresponding authors

## Supplementary Information

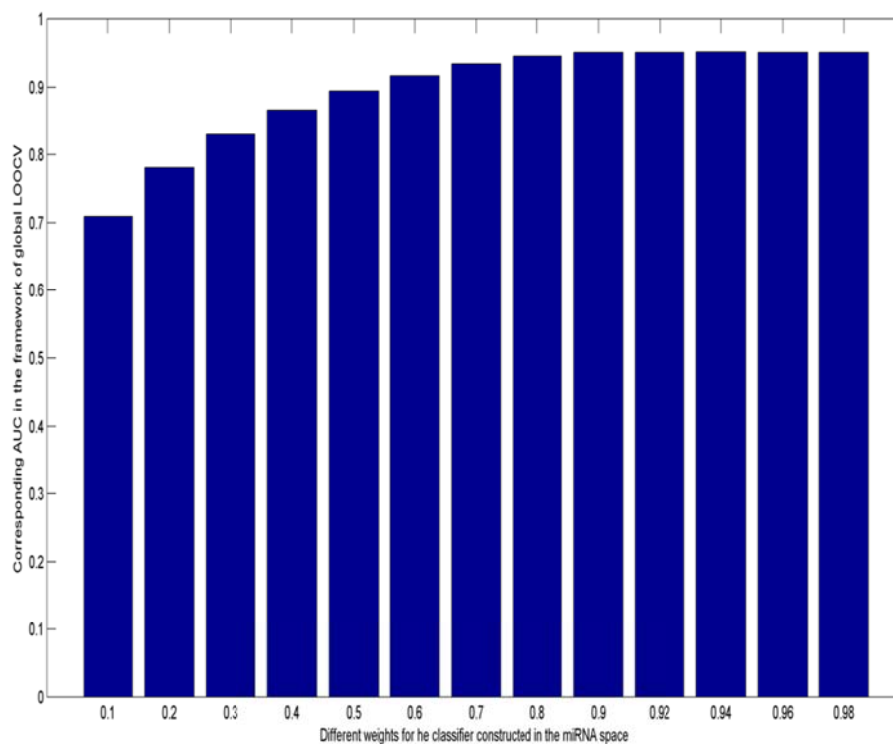

**Supplemental Figure 1.** Different weights have been assigned to the classifier constructed in the miRNA space and corresponding AUCs have been shown. It could

be observed that a higher weight can improve the final performance of RLSMDA.

**Supplemental Table 1.** The top 50 potential colonic cancer related miRNAs and confirmation evidences for the associations were listed.

**Supplemental Table 2.** The top 100 potential disease-miRNA associations were shown and verified based on various databases and literatures.

**Supplemental Table 3.** The top 50 potential HCC related miRNAs when the information about known HCC related miRNAs are removed and evidences for the associations with HCC were listed

**Supplemental Table 4.** The top 50 potential colon cancer related miRNAs when the information about known colon cancer related miRNAs are removed and evidences for the associations with colon cancer were listed.

**Supplemental Table 5.** RLSMDA is further applied to predict potential human disease-miRNAs associations after confirming the reliable performance of RLSMDA in the term of cross validation and case studies. All the known disease-miRNA associations in the gold-standard dataset were used as positive samples. We publicly released potential human disease-miRNA association list to facilitate the biological experimental validation.

**Supplemental Table 6.** Known human miRNA-disease association dataset.

**Supplemental Table 7.** miRNA functional similarity scores used in this paper.

**Supplemental Table 8.** Disease semantic similarity used in this paper.
